# Supplementary material for: Psychological Factors Affecting Risk Perception of COVID-19: Evidence from Peru and China
Source: MDPI journal article supplement (doi:10.3390/ijerph18126513), 2021-06-17
Supplement: s1 [file s1]

## Supplementary material S2

*Comparisons of risk perception with age, anxiety, perceived threats, questions 1 and 2 of trust of information, self-confidence, sex and country.*

| Variable                                                                                                                                                    | Sample<br>Total<br>(N = 1594) | Low<br>(N = 558) | Medium<br>(N = 776) | High<br>(N = 260) | $\chi^2$ | p        |
|-------------------------------------------------------------------------------------------------------------------------------------------------------------|-------------------------------|------------------|---------------------|-------------------|----------|----------|
|                                                                                                                                                             | n(%)                          | n(%)             | n(%)                | n(%)              |          |          |
| Age                                                                                                                                                         |                               |                  |                     |                   | 4.20     | 0.123    |
| 18 to 38 years                                                                                                                                              | 1340 (84)                     | 472 (35.2)       | 661 (49.3)          | 207 (15.4)        |          |          |
| 39 to 59 years                                                                                                                                              | 239 (15)                      | 80 (33.5)        | 110 (46)            | 49 (20.5)         |          |          |
| 60 years or more                                                                                                                                            | 14(1)                         | 5 (35.7)         | 5 (35.7)            | 4 (28.6)          |          |          |
| GAD-7 (Anxiety)                                                                                                                                             |                               |                  |                     |                   | 109.53   | 0.001*** |
| No anxiety                                                                                                                                                  | 908 (57)                      | 395 (43.5)       | 415 (45.7)          | 98 (10.8)         |          |          |
| Mild anxiety                                                                                                                                                | 474 (29.7)                    | 114 (24.1)       | 259 (54.6)          | 101 (21.3)        |          |          |
| Moderate anxiety                                                                                                                                            | 158 (9.9)                     | 39 (24.7)        | 79 (50)             | 40 (25.3)         |          |          |
| Severe anxiety                                                                                                                                              | 54 (3.4)                      | 10 (18.5)        | 23 (42.6)           | 21 (38.9)         |          |          |
| Perceived threats to Covid-19                                                                                                                               |                               |                  |                     |                   | 532.71   | 0.001*** |
| Mild                                                                                                                                                        | 50 (3)                        | 33 (66)          | 10 (20)             | 7 (14)            |          |          |
| Moderate                                                                                                                                                    | 832 (52.2)                    | 411 (49.4)       | 355 (42.7)          | 66 (7.9)          |          |          |
| Serious                                                                                                                                                     | 712 (44.7)                    | 114 (16)         | 411 (57.7)          | 187 (26.3)        |          |          |
| Is the information I have received from the government about the outbreak of the new coronavirus sufficient? – Trust in Government Information1             |                               |                  |                     |                   | 69.82    | 0.001*** |
| Strongly disagree                                                                                                                                           | 102 (6.4)                     | 28 (27.5)        | 50 (49)             | 24 (23.5)         |          |          |
| Disagree                                                                                                                                                    | 274 (17.2)                    | 53 (19.3)        | 165 (60.2)          | 56 (20.4)         |          |          |
| Neither agree nor disagree                                                                                                                                  | 483 (30.3)                    | 150 (31.1)       | 261 (54)            | 72 (14.9)         |          |          |
| Agree                                                                                                                                                       | 586 (36.8)                    | 241 (41.1)       | 257 (43.9)          | 88 (15)           |          |          |
| Strongly agree                                                                                                                                              | 149 (9.3)                     | 86 (57.7)        | 43 (28.9)           | 20 (13.3)         |          |          |
| How often have you been confused or concerned about the reliability of the information you received from the government? - Trust in Government Information2 |                               |                  |                     |                   | 162.85   | 0.001*** |
| Never                                                                                                                                                       | 118 (7.4)                     | 80 (67.8)        | 28 (23.7)           | 10 (8.5)          |          |          |
| Rarely                                                                                                                                                      | 286 (17.9)                    | 152 (53.1)       | 111 (38.8)          | 23 (8)            |          |          |
| Sometimes                                                                                                                                                   | 828 (51.9)                    | 255 (30.8)       | 440 (53.1)          | 133 (16.1)        |          |          |
| Usually                                                                                                                                                     | 289 (18.1)                    | 51 (17.6)        | 174 (60.2)          | 64 (22.1)         |          |          |
| Always                                                                                                                                                      | 73 (4.6)                      | 20 (27.4)        | 23 (31.5)           | 30 (41.1)         |          |          |
| Do I think I can take steps to protect myself against the coronavirus? – Self-confidence                                                                    |                               |                  |                     |                   | 5.42     | 0.247    |
| Strongly disagree                                                                                                                                           | 47 (2.9)                      | 17 (36.2)        | 16 (34)             | 14 (29.8)         |          |          |
| Disagree                                                                                                                                                    | 63 (4)                        | 17 (27)          | 36 (57.1)           | 10 (15.9)         |          |          |

|                                                                            |             |            |            |                     |
|----------------------------------------------------------------------------|-------------|------------|------------|---------------------|
| Neither agree nor disagree                                                 | 184 (11.5)  | 66 (35.9)  | 100 (54.3) | 18 (9.8)            |
| Agree                                                                      | 897 (56.3)  | 299 (33.3) | 449 (50.1) | 149 (16.6)          |
| Strongly agree                                                             | 403 (25.3)  | 159 (39.5) | 175 (43.4) | 69 (17.1)           |
| <hr/>                                                                      |             |            |            |                     |
|                                                                            |             |            |            | Wilcoxon            |
| Sex                                                                        |             |            |            | 12.84      0.001*** |
| Female                                                                     | 821 (51.5)  | 229 (27.9) | 435 (53)   | 157 (19.1)          |
| Male                                                                       | 773 (48.5)  | 329 (42.6) | 341 (44.1) | 103 (13.3)          |
| <hr/>                                                                      |             |            |            |                     |
| Country                                                                    |             |            |            | 13.03      0.001*** |
| Perú                                                                       | 1092 (68.6) | 185 (16.9) | 675 (61.8) | 232 (21.2)          |
| China                                                                      | 502 (31.4)  | 373 (74.3) | 101 (20.1) | 28 (5.6)            |
| <hr/>                                                                      |             |            |            |                     |
| Note: $\chi^2$ : Kruskal Wallis and $W$ : Wilcoxon, for nonparametric data |             |            |            |                     |
