# Supplementary material for: Psychological Factors Affecting Risk Perception of COVID-19: Evidence from Peru and China
Source: MDPI journal article supplement (doi:10.3390/ijerph18126513), 2021-06-17
Supplement: s1 [file s1]

## Supplementary material S3

### *Differences in the levels of the variables by country*

|                                                                                                                                                             | Total (%)   | Country      |             |
|-------------------------------------------------------------------------------------------------------------------------------------------------------------|-------------|--------------|-------------|
|                                                                                                                                                             |             | Peru N (%)   | China N (%) |
| Risk Perception                                                                                                                                             |             |              |             |
| Low                                                                                                                                                         | 558 (35%)   | 185 (33.2%)  | 373 (66.8%) |
| Medium                                                                                                                                                      | 776 (48.7%) | 675 (87%)    | 101 (13%)   |
| High                                                                                                                                                        | 260 (16.3%) | 232 (89.2%)  | 28 (10.8%)  |
| Total                                                                                                                                                       | 1594 (100%) | 1092 (68.5%) | 502 (31.5%) |
| Perceived threats to Covid-19                                                                                                                               |             |              |             |
| Mild                                                                                                                                                        | 50 (3.1%)   | 25 (50%)     | 25(50%)     |
| Moderate                                                                                                                                                    | 832 (52.2%) | 458(55%)     | 374 (45%)   |
| Serious                                                                                                                                                     | 712 (44.7%) | 609 (85.5%)  | 103 (14.5%) |
| Total                                                                                                                                                       | 1594 (100%) | 1092 (68.5%) | 502 (31.5%) |
| Anxiety                                                                                                                                                     |             |              |             |
| No Anxiety                                                                                                                                                  | 908 (57%)   | 591 (65.1%)  | 317(34.9%)  |
| Mild anxiety                                                                                                                                                | 474(29.7%)  | 352 (74.3%)  | 122(25.7%)  |
| Moderate Anxiety                                                                                                                                            | 158(9.9%)   | 114 (72.2%)  | 44 (27.8%)  |
| Severe Anxiety                                                                                                                                              | 54(3.4%)    | 35 (64.8%)   | 19 (35.2%)  |
| Total                                                                                                                                                       | 1594 (100%) | 1092 (68.5%) | 502 (31.5%) |
| Is the information I have received from the government about the outbreak of the new coronavirus sufficient? – Trust in Government Information1             |             |              |             |
| Strongly disagree                                                                                                                                           | 102 (6.4%)  | 85(83.3%)    | 17(16.7%)   |
| Disagree                                                                                                                                                    | 274 (17.2%) | 261(95.3%)   | 13(4.7%)    |
| Neither agree nor disagree                                                                                                                                  | 483(30.3%)  | 351(72.7%)   | 132(27.3%)  |
| Agree                                                                                                                                                       | 586(36.8%)  | 348(59.4%)   | 238(40.6%)  |
| Strongly agree                                                                                                                                              | 149(9.3%)   | 47(31.5%)    | 102(68.5%)  |
| Total                                                                                                                                                       | 1594(100%)  | 1092(68.5%)  | 502(31.5%)  |
| How often have you been confused or concerned about the reliability of the information you received from the government? - Trust in Government Information2 |             |              |             |
| Never                                                                                                                                                       | 118(7.4%)   | 41(34.7%)    | 77(65.3%)   |
| Rarely                                                                                                                                                      | 286(17.9%)  | 142(49.7%)   | 144(50.3%)  |
| Sometimes                                                                                                                                                   | 828(51.9%)  | 617(74.5%)   | 211(25.5%)  |
| Usually                                                                                                                                                     | 289(18.1%)  | 239(82.7%)   | 50(17.3%)   |
| Always                                                                                                                                                      | 73(4.6%)    | 53(72.6%)    | 20(27.4%)   |
| Total                                                                                                                                                       | 1594(100%)  | 1092(68.5%)  | 502(31.5%)  |
| Do I think I can take steps to protect myself against the coronavirus? – Self-confidence                                                                    |             |              |             |
| Strongly disagree                                                                                                                                           | 47 (2.9%)   | 32(68.1%)    | 15 (31.9%)  |
| Disagree                                                                                                                                                    | 63 (4%)     | 50 (79.4%)   | 13 (20.6%)  |
| Neither agree nor disagree                                                                                                                                  | 184 (11.5%) | 113 (61.4%)  | 71 (38.6%)  |
| Agree                                                                                                                                                       | 897 (56.3%) | 635 (70.8%)  | 262 (29.2%) |
| Strongly agree                                                                                                                                              | 403 (25.3%) | 262 (65%)    | 141 (35%)   |
| Total                                                                                                                                                       | 1594 (100%) | 1092 (68.5%) | 502 (31.5%) |
